# Supplementary material for: (H3N–BH3)4: the ammonia borane tetramer
Source: Royal Society of Chemistry journal article supplement (doi:10.1039/c2cp41765k), 2012-01-01
Supplement: c2cp41765k.pdf [file c2cp41765k.pdf]

The ammonia borane tetramer

Doris Guerra, Albeiro Restrepo  
Universidad de Antioquia

Jorge David  
Universidad Eafit

Optimized geometry at the MP2/6-311++g(d,p) level

S4 structure

|   |             |             |             |
|---|-------------|-------------|-------------|
| N | -2.40463400 | 0.07008600  | 0.81328800  |
| H | -3.31786300 | -0.04578500 | 1.24653200  |
| H | -1.77149000 | -0.63070300 | 1.20621500  |
| B | -2.49881600 | -0.07008600 | -0.80079900 |
| H | -1.36582000 | 0.07379100  | -1.21698200 |
| H | -2.90526700 | -1.19139300 | -1.03064000 |
| H | -2.03202200 | 0.98185000  | 1.08808500  |
| H | -3.24683000 | 0.79139000  | -1.19703100 |
| N | 0.07008600  | 2.40463400  | -0.81328800 |
| H | 0.98185000  | 2.03202200  | -1.08808500 |
| H | -0.63070300 | 1.77149000  | -1.20621500 |
| B | -0.07008600 | 2.49881600  | 0.80079900  |
| H | -1.19139300 | 2.90526700  | 1.03064000  |
| H | 0.07379100  | 1.36582000  | 1.21698200  |
| H | -0.04578500 | 3.31786300  | -1.24653200 |
| H | 0.79139000  | 3.24683000  | 1.19703100  |
| N | 2.40463400  | -0.07008600 | 0.81328800  |
| H | 3.31786300  | 0.04578500  | 1.24653200  |
| H | 1.77149000  | 0.63070300  | 1.20621500  |
| B | 2.49881600  | 0.07008600  | -0.80079900 |
| H | 1.36582000  | -0.07379100 | -1.21698200 |
| H | 2.90526700  | 1.19139300  | -1.03064000 |
| H | 2.03202200  | -0.98185000 | 1.08808500  |
| H | 3.24683000  | -0.79139000 | -1.19703100 |
| N | -0.07008600 | -2.40463400 | -0.81328800 |
| H | 0.63070300  | -1.77149000 | -1.20621500 |
| H | 0.04578500  | -3.31786300 | -1.24653200 |
| B | 0.07008600  | -2.49881600 | 0.80079900  |
| H | -0.79139000 | -3.24683000 | 1.19703100  |
| H | 1.19139300  | -2.90526700 | 1.03064000  |
| H | -0.98185000 | -2.03202200 | -1.08808500 |
| H | -0.07379100 | -1.36582000 | 1.21698200  |
